# Supplementary material for: Cytoplasmic SHMT2 drives the progression and metastasis of colorectal cancer by inhibiting β-catenin degradation
Source: PubMed Central journal article supplement (PMC7806468; doi:10.7150/thno.48699), 2021-01-01
Supplement: thnov11p2966s1.pdf [file thnov11p2966s1.pdf]

---

**Supplemental Information**

**Cytoplasmic SHMT2 drives the progression and metastasis of colorectal cancer  
by inhibiting  $\beta$ -catenin degradation**

**Supporting information includes:**

**8 Supplementary Figures**

**3 Supplementary Tables**

**Figure S1**

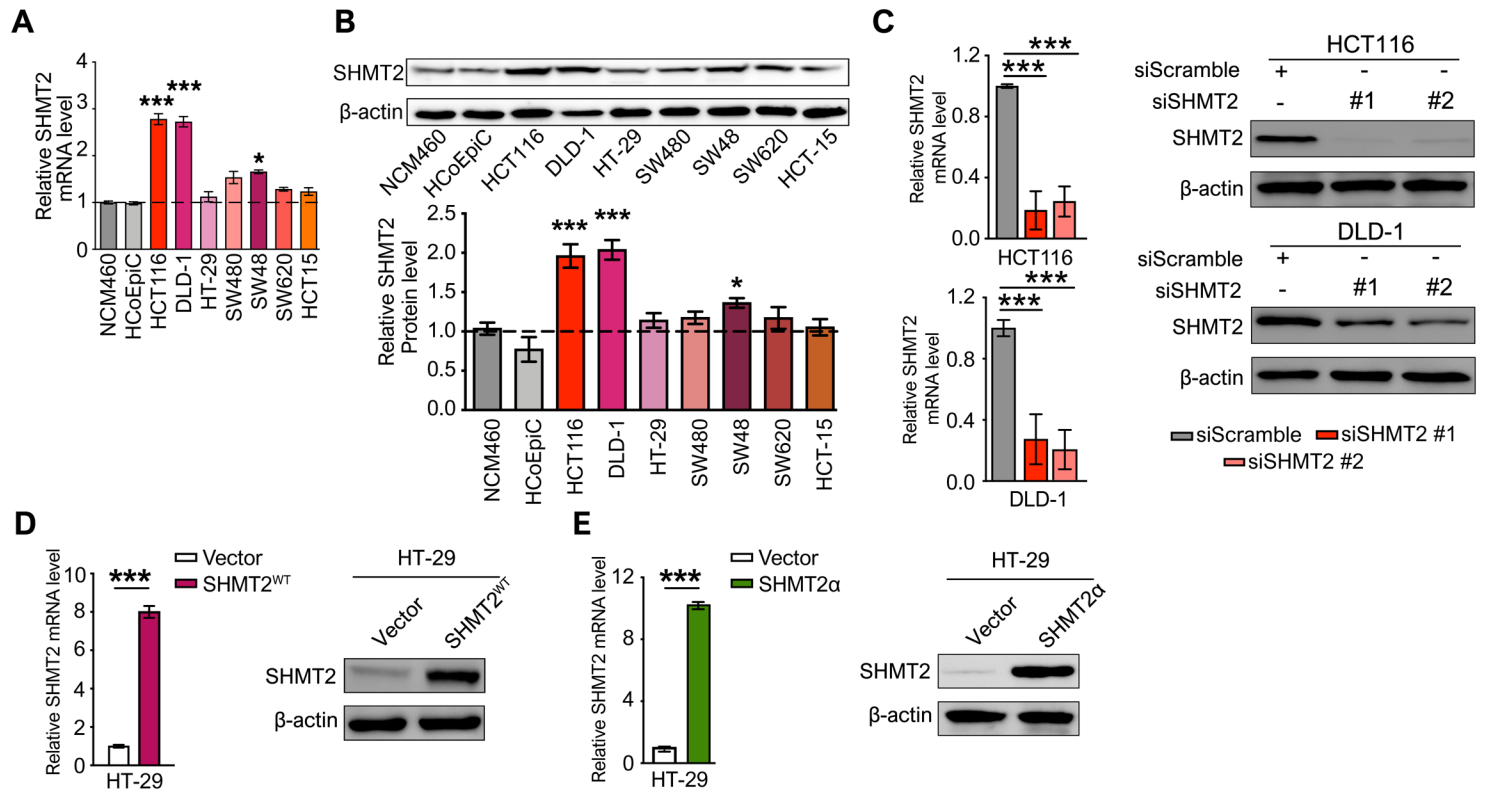

**Figure S2**

**A**

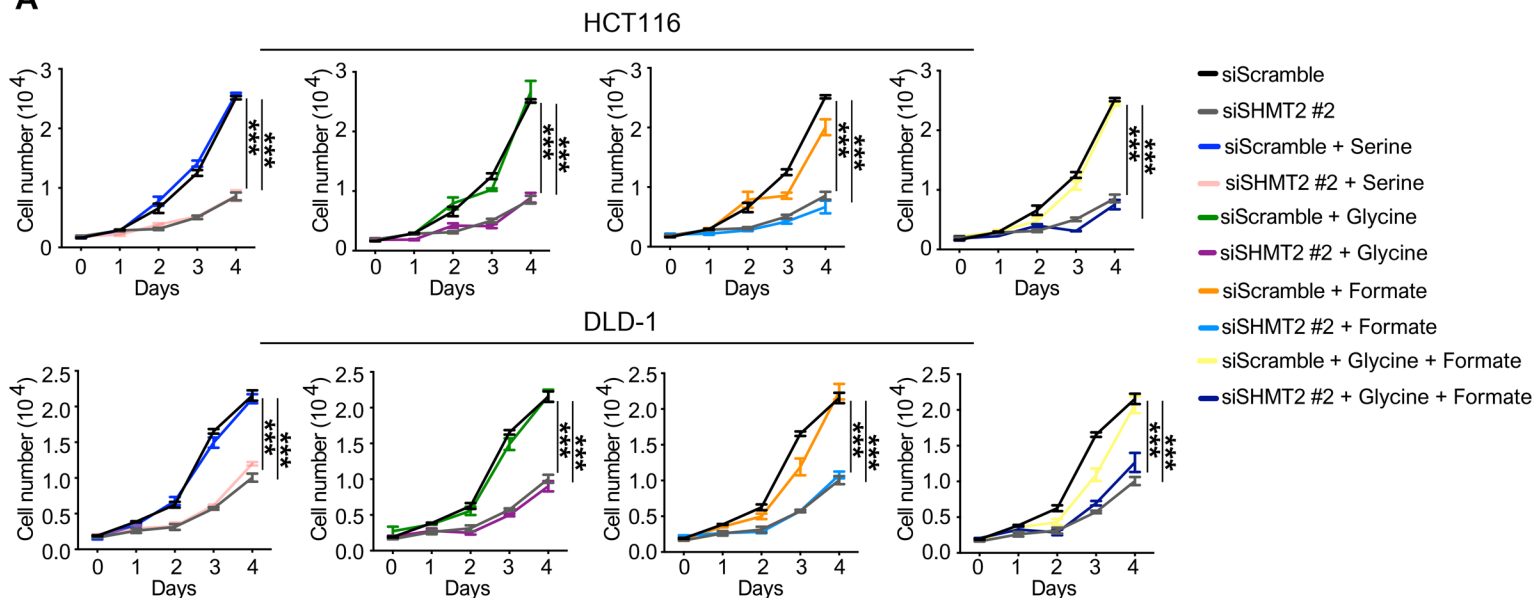

**B**

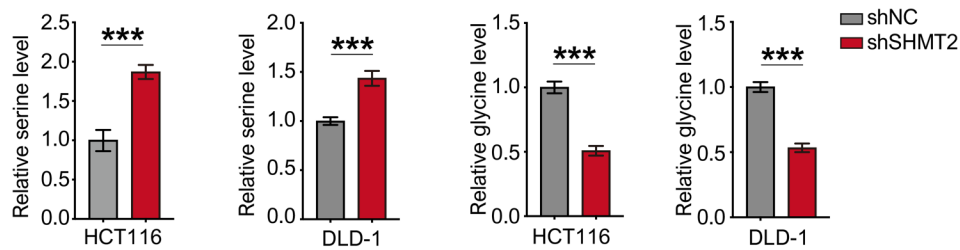

**C**

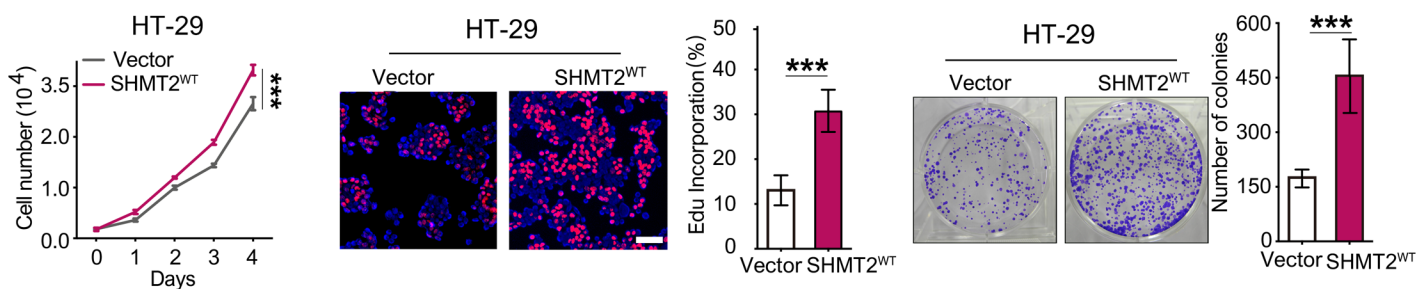

**D**

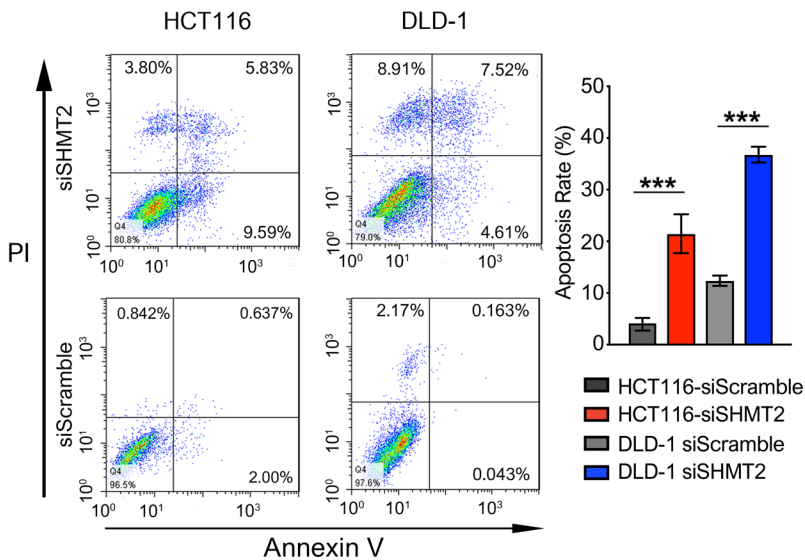

**E**

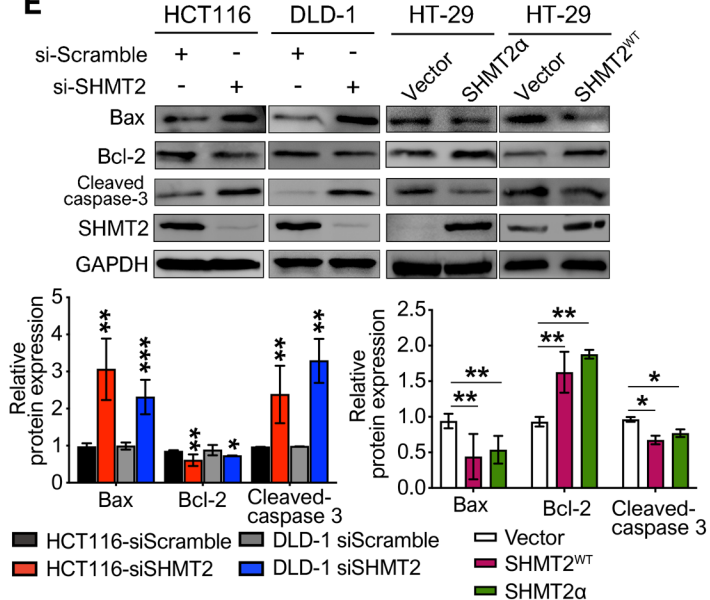

**Figure S3**

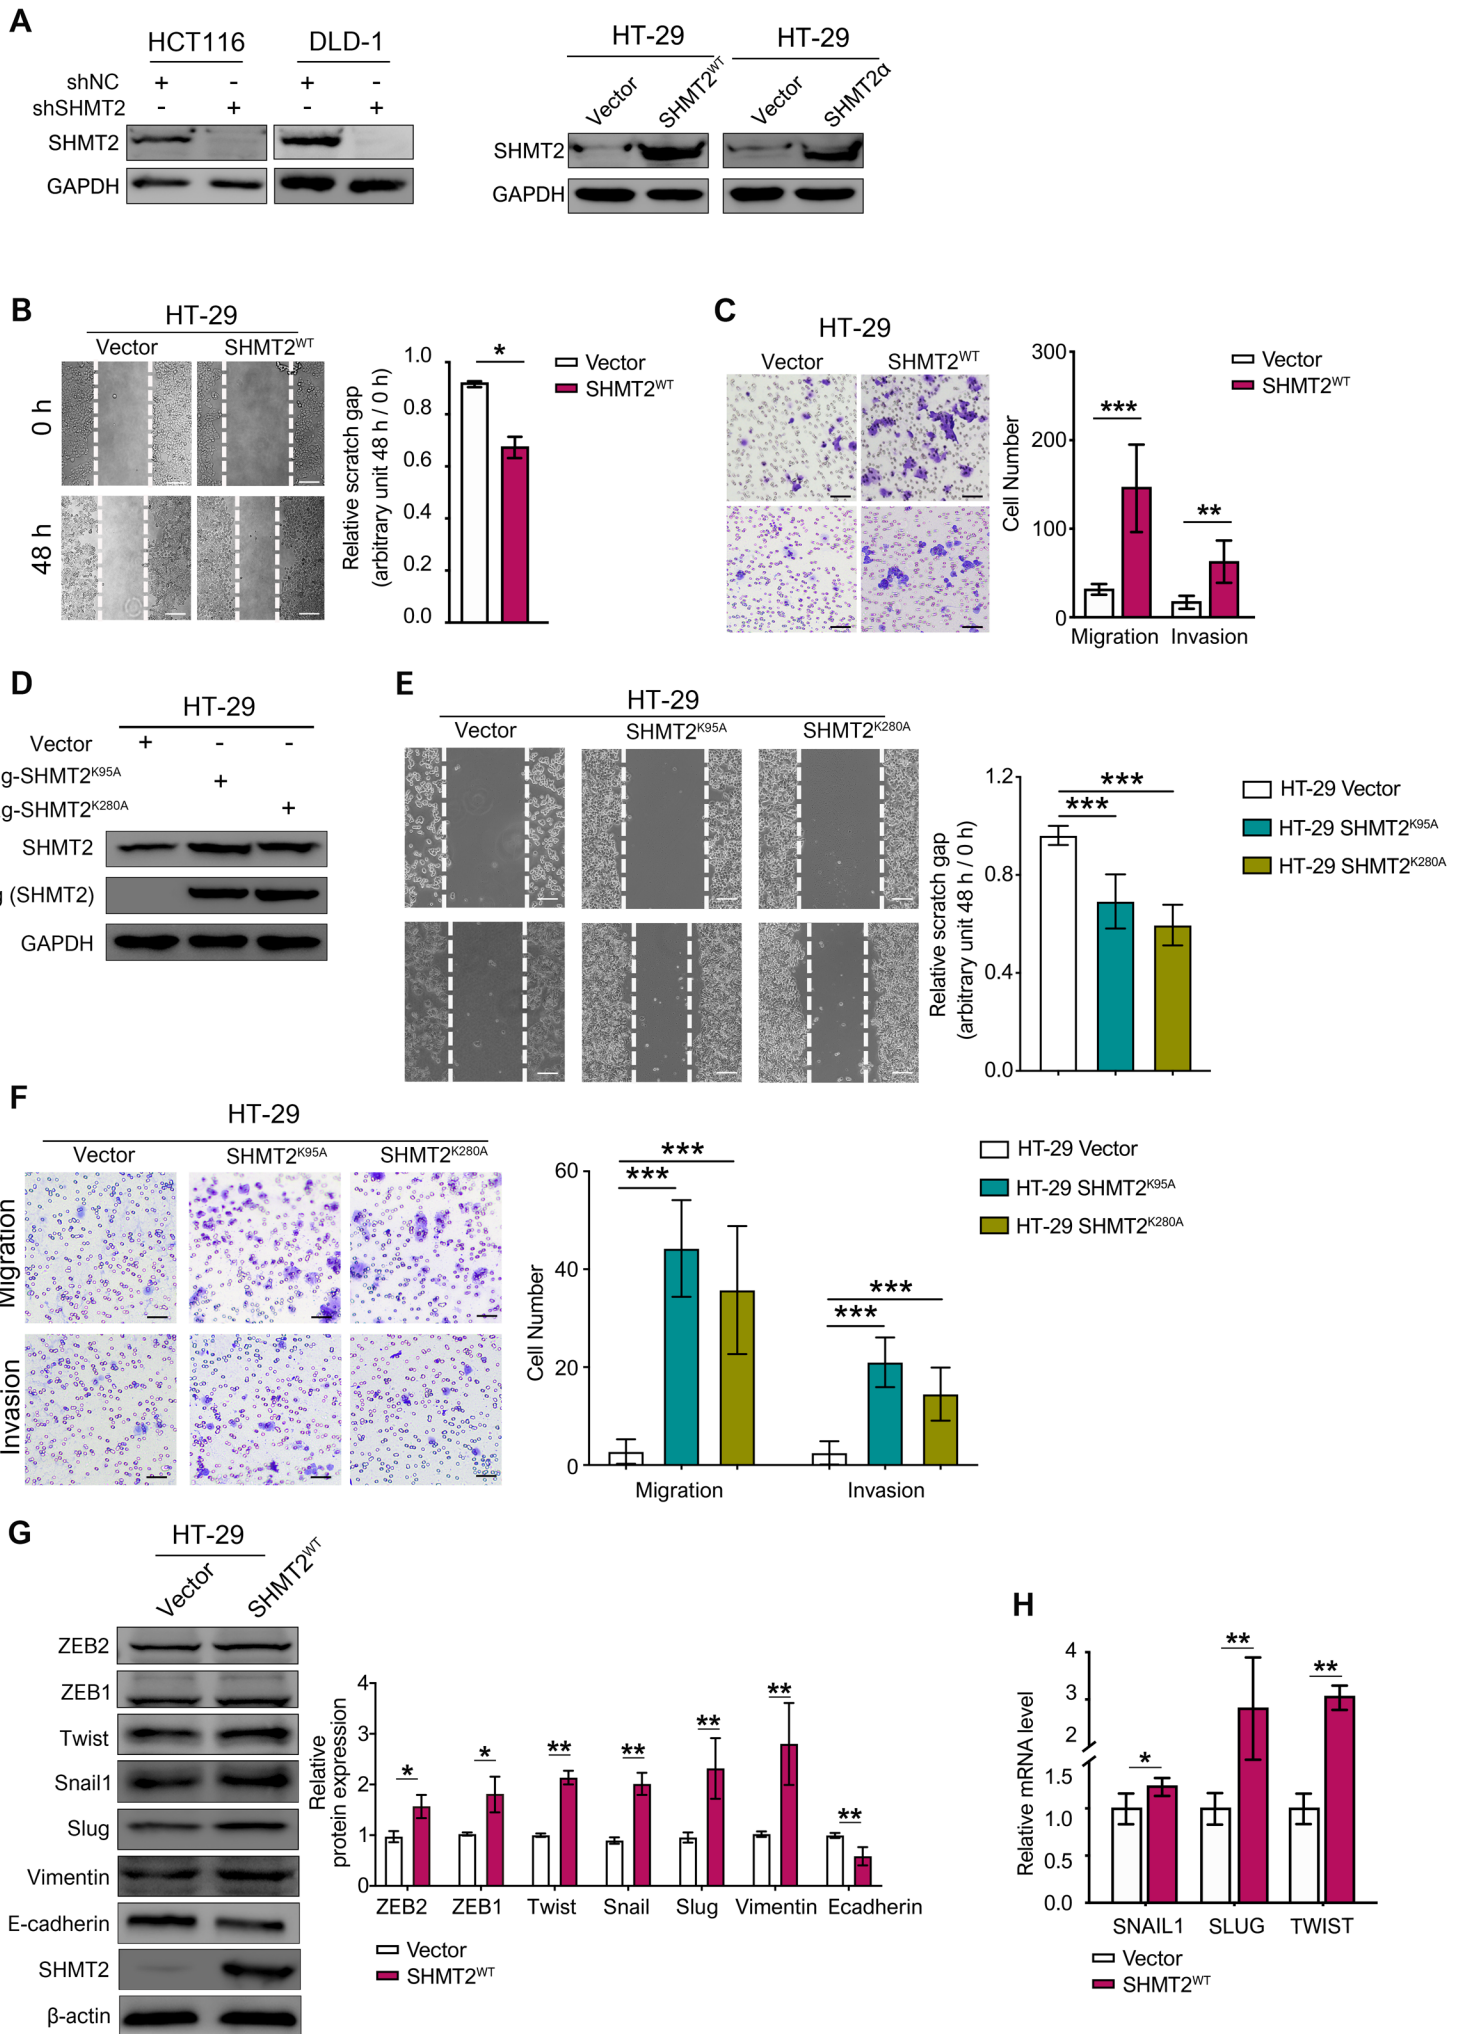



**Figure S4**

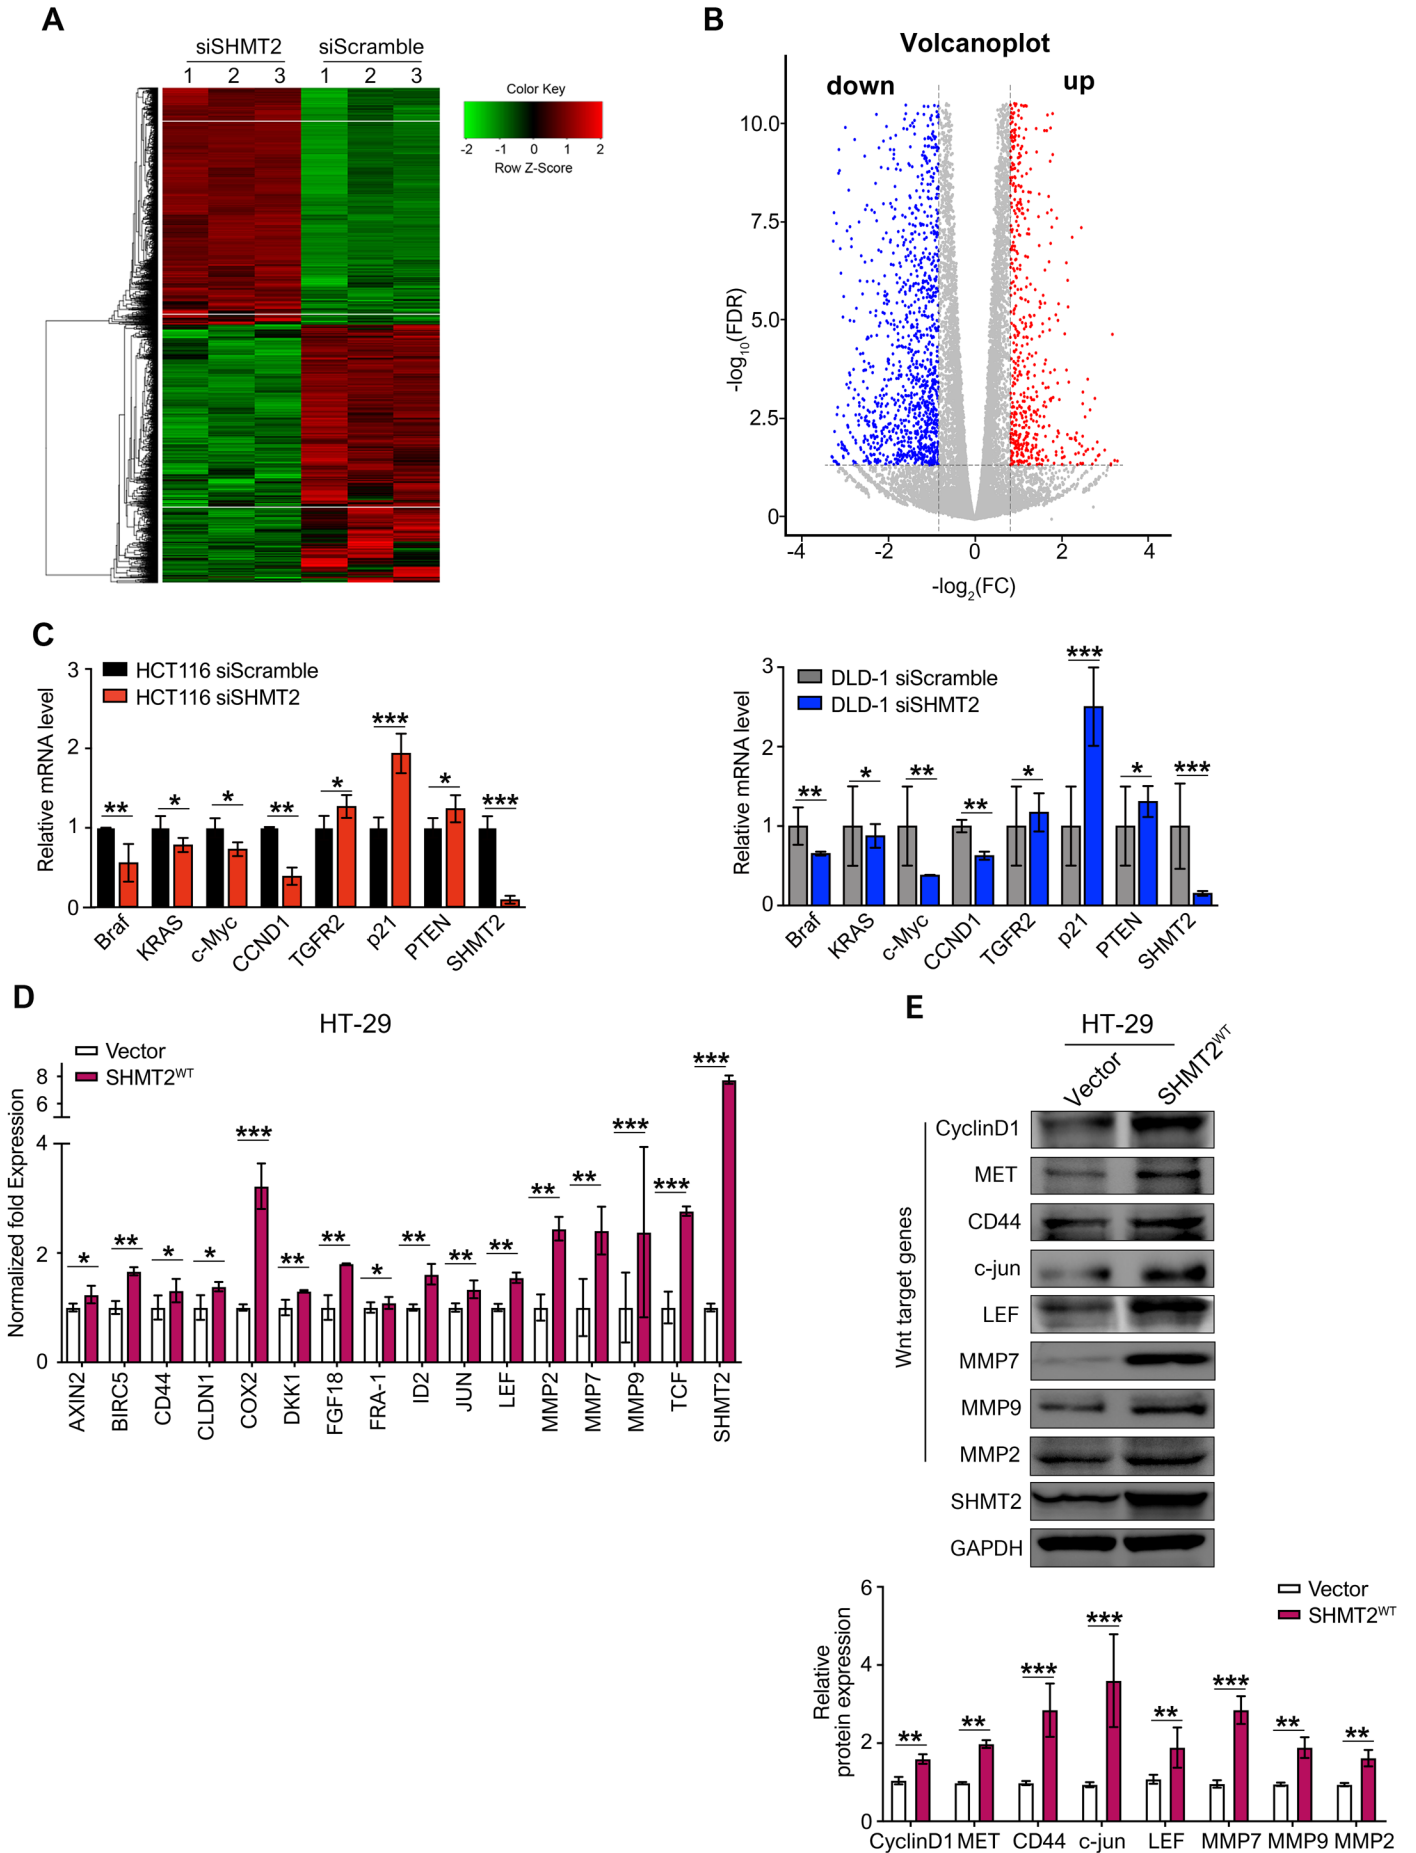

**Figure S5**

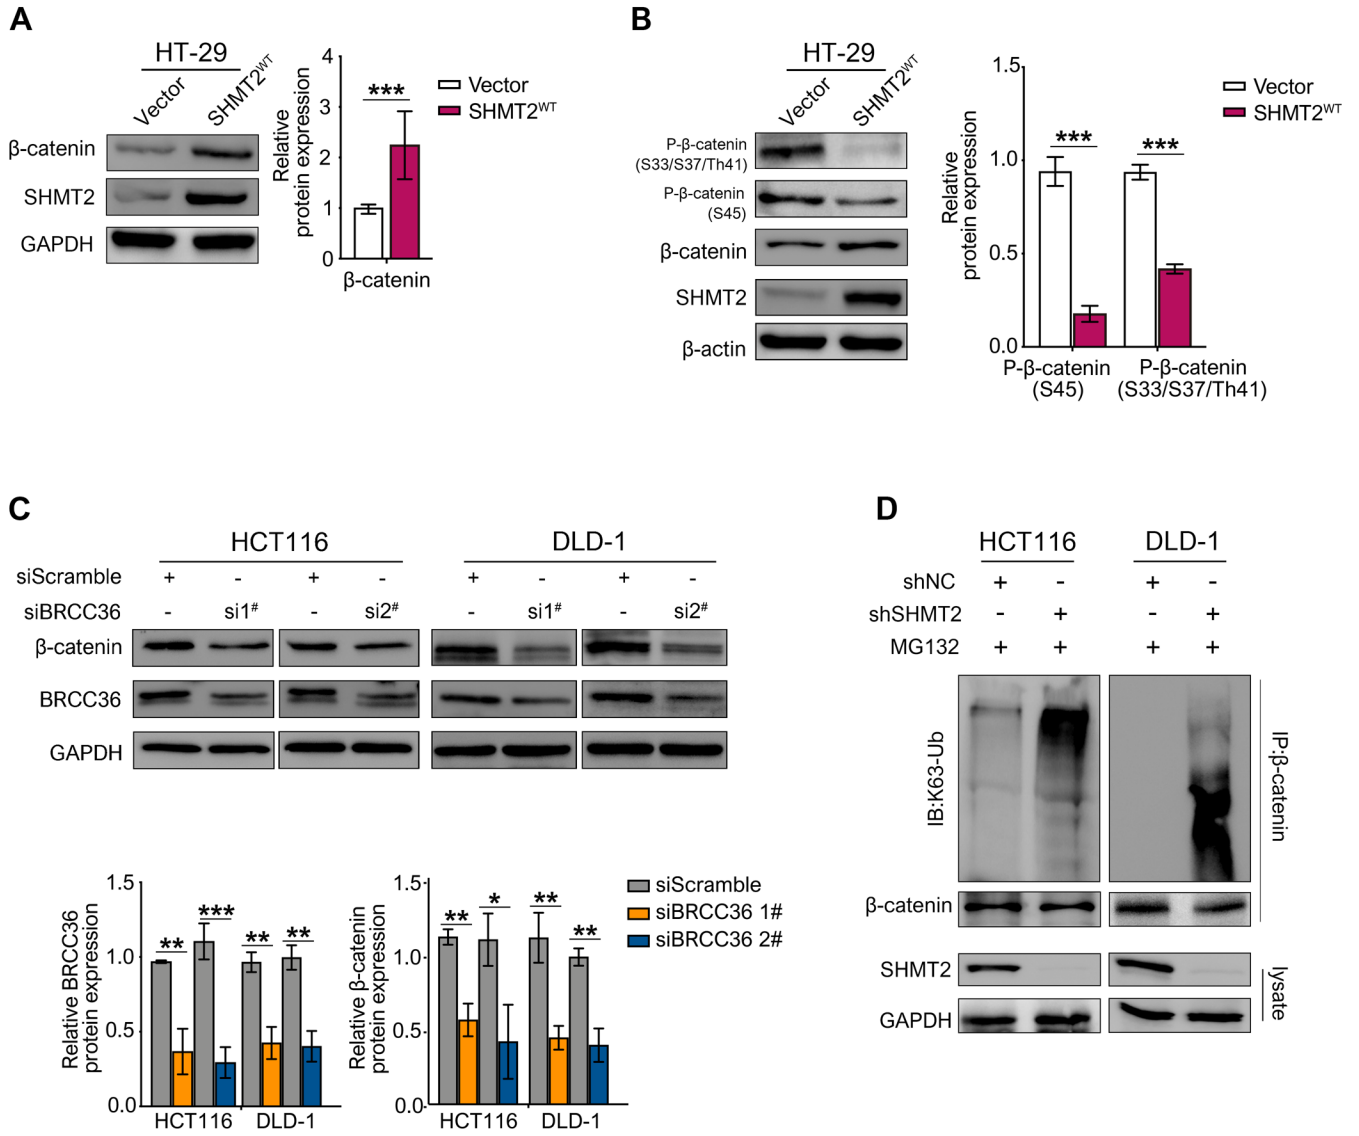

**Figure S6**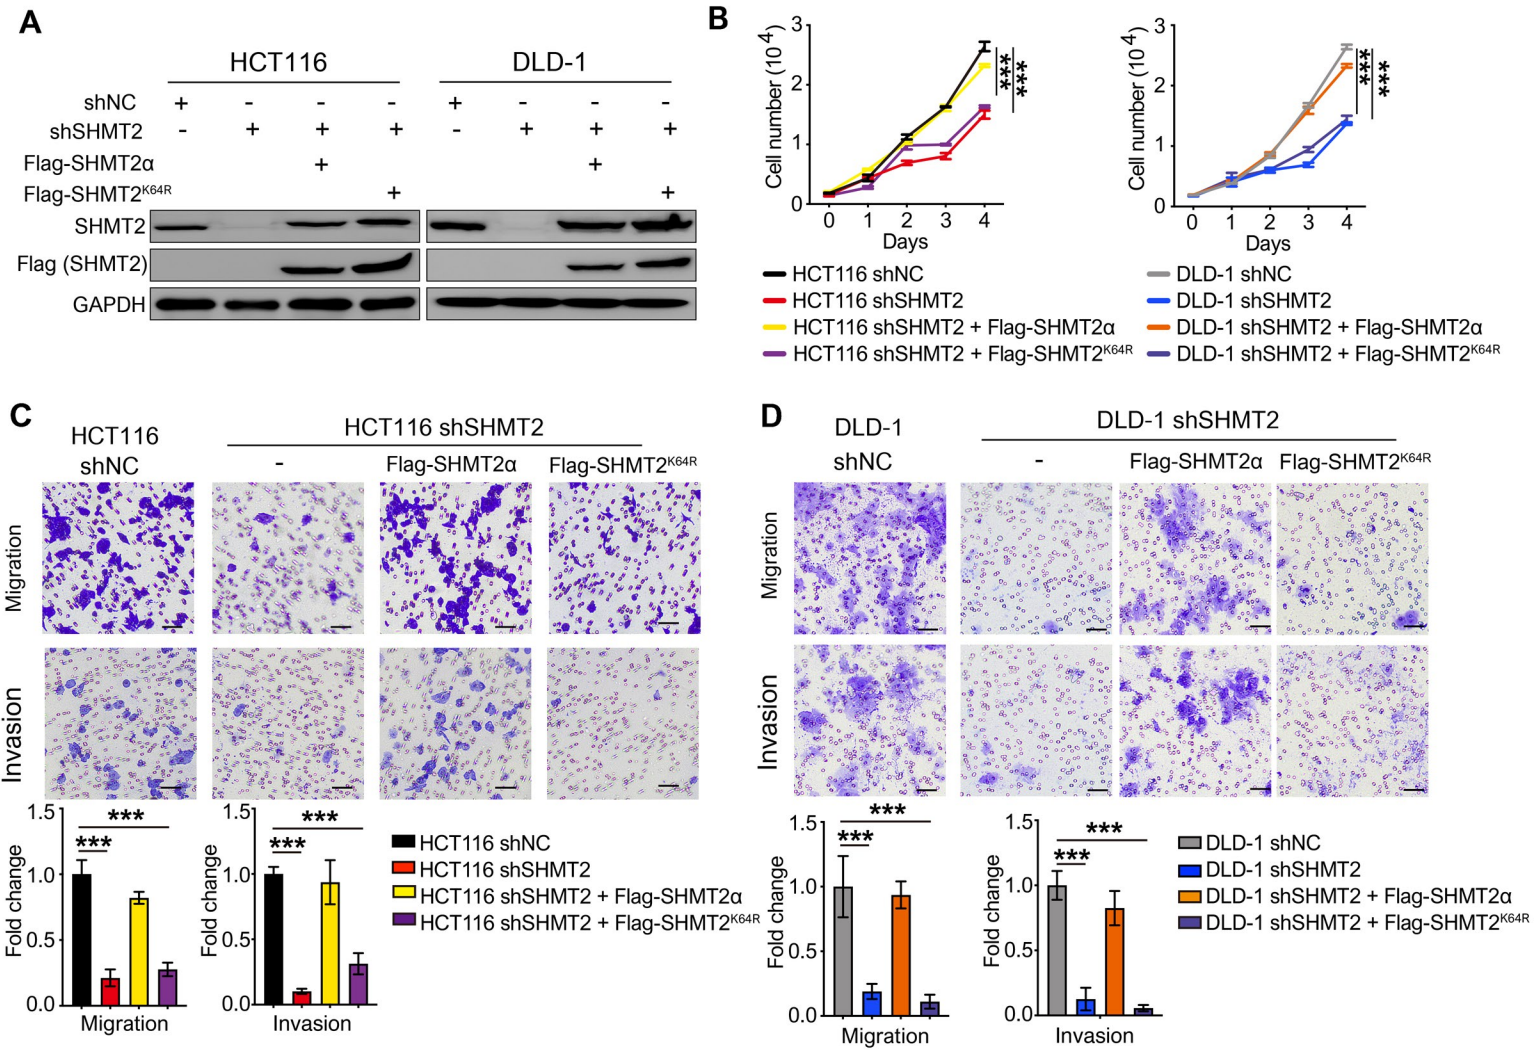

**Figure S7**

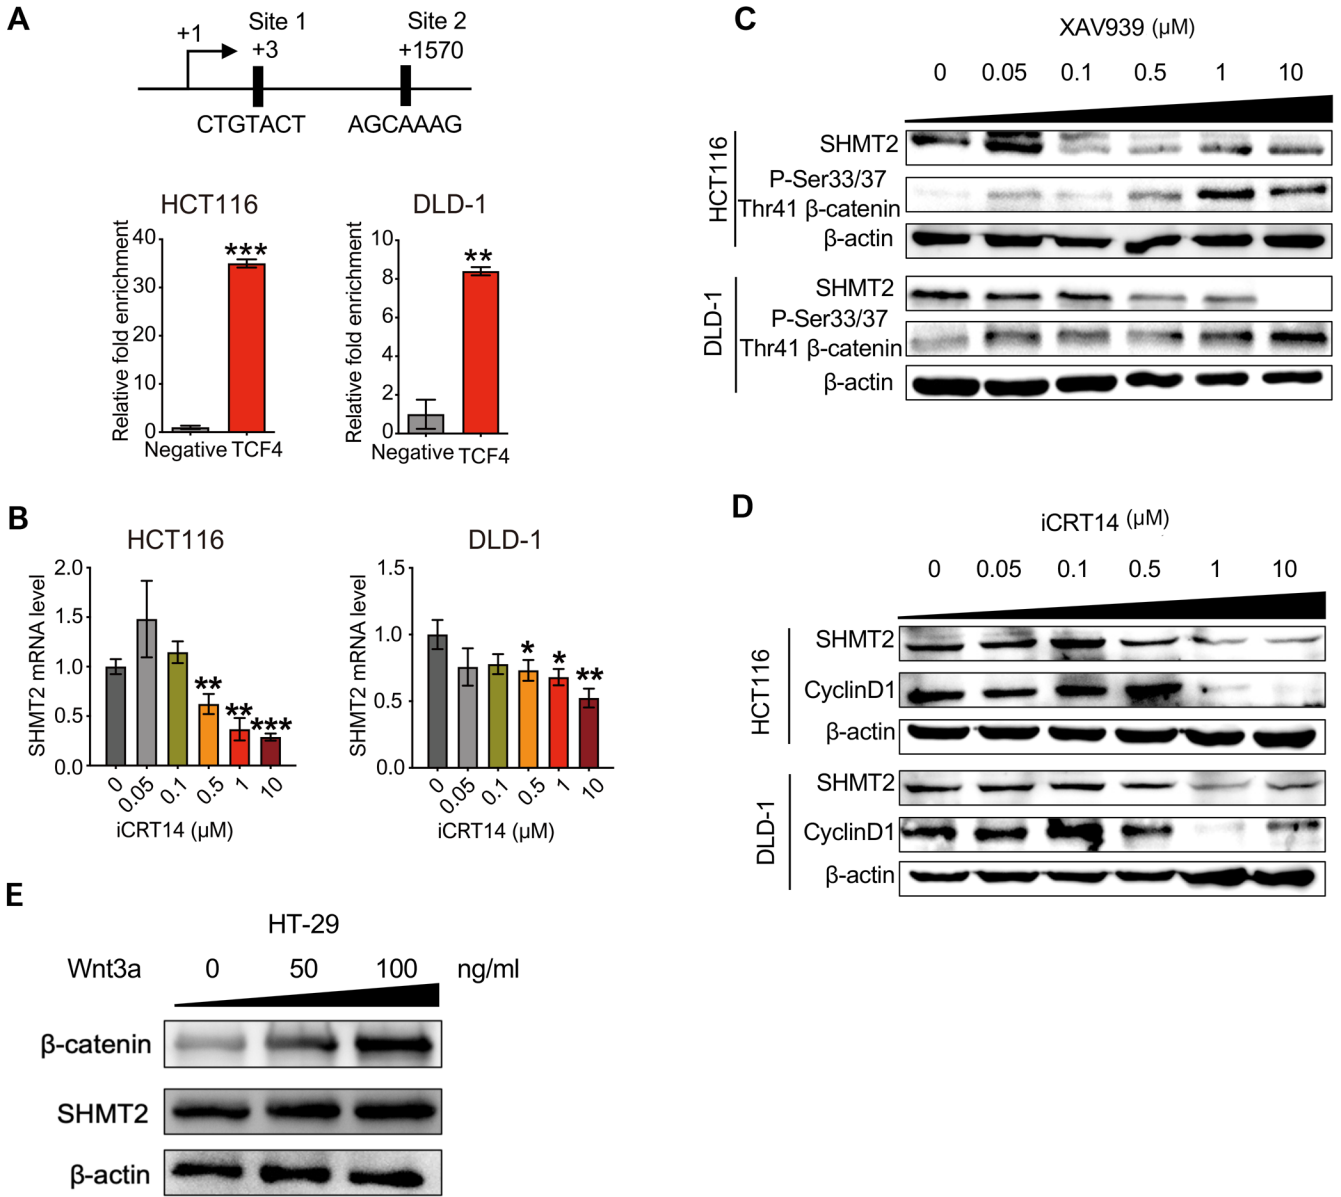

**Figure S8**

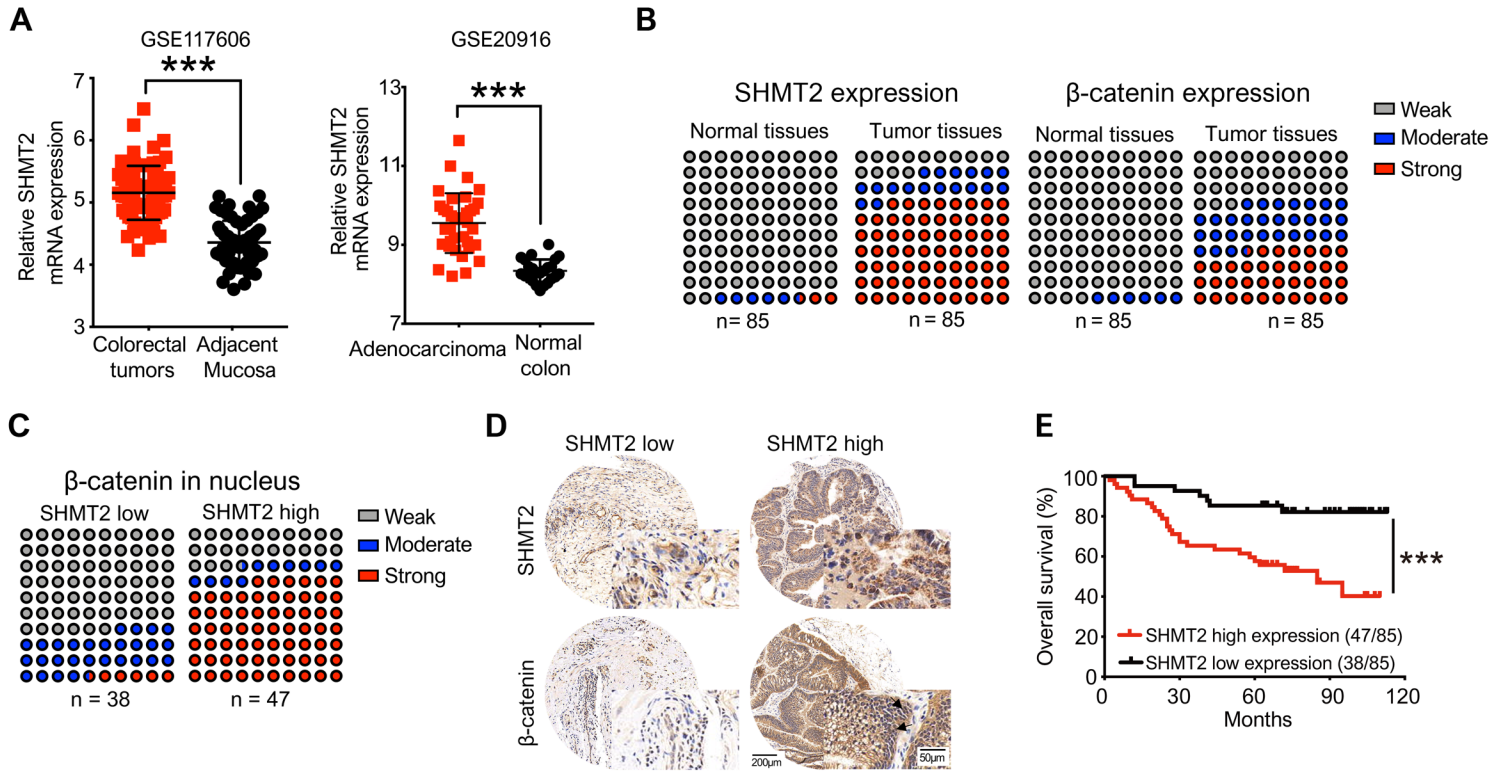

---

**Figure S1. SHMT2 is overexpressed in human CRC cells. Related to Figure 1.**

(A) The relative mRNA level of SHMT2 in human CRC cells and normal colonic epithelial cell NCM460 and HCoEpiC. \*  $p < 0.05$ , \*\*\*  $p < 0.001$ ; Student's t-test.

(B) Western blot analysis (up) and quantification (bottom) of SHMT2 in human CRC cells and normal colonic epithelial cell NCM460 and HCoEpiC. \*  $p < 0.05$ , \*\*\*  $p < 0.001$ ; Ordinary one-way ANOVA multiple comparisons test.

(C) The knockdown of SHMT2 by siRNA in HCT116 and DLD-1 cells were confirmed by RT-qPCR and western blot analysis. \*\*\*  $p < 0.001$ ; Ordinary one-way ANOVA multiple comparisons test.

(D) (E) The overexpression of SHMT2<sup>WT</sup> and SHMT2 $\alpha$  in HT-29 cells was confirmed by RT-qPCR and western blot analysis. \*\*\*  $p < 0.001$ ; Student's t-test.

Data are presented as the mean  $\pm$  SD from at least three independent experiments. The error bars show the SD.

**Figure S2. SHMT2 promotes CRC cell proliferation and regulates cell apoptosis. Related to Figure 1.**

(A) Cells proliferation was detected by CCK8 assay by siSHMT2 #2, with or without 400  $\mu$ M serine, 400  $\mu$ M glycine or 1mM formate supplementation (n = 3). \*\*\*  $p < 0.001$ ; Ordinary one-way ANOVA multiple comparisons test.

(B) CRC cells with shSHMT2 were harvested in 80% confluence. Serine and glycine levels in cells were analyzed by LC-MS (n = 3). The relative quantities of metabolites were shown. \*\*\*  $p < 0.001$ ; Student's t-test.

(C) Representative images and quantification of cell proliferation (left) (n = 3), EdU incorporation assay (middle) (n = 5) and colony formation assay (right) (n = 3) using HT29 cells with SHMT2<sup>WT</sup> overexpression. Scale bar, 50  $\mu$ m. \*\*  $p < 0.01$ ; Student's t-test.



---

(D) HCT116 and DLD-1 cells with siSHMT2 were stained by annexin V/propidium iodide (PI), followed by flow cytometry (n = 3). The relative quantities of the apoptosis rate (%) were shown. \*\*\*  $p < 0.001$ ; Student's t-test.

(E) Western blot analysis (up) and quantification (bottom) of SHMT2, BAX, Bcl-2 and Cleaved-caspase-3 in CRC cells with SHMT2 knockdown, SHMT2 $\alpha$  and SHMT2<sup>WT</sup> overexpression. \*  $p < 0.1$ , \*\*  $p < 0.05$ , \*\*\*  $p < 0.001$ ; Student's t-test and Ordinary one-way ANOVA multiple comparisons test.

Data are presented as the mean  $\pm$  SD from at least three independent experiments. The error bars show the SD.

**Figure S3. The catalytic function of SHMT2 is not indispensable for the migration and invasion ability of HT-29 cells. Related to Figure 2.**

(A) The knockdown of SHMT2 by shRNA in HCT116 and DLD-1 cells were confirmed by western blot analysis. The overexpression of SHMT2<sup>WT</sup> and SHMT2 $\alpha$  in HT-29 cells was confirmed by western blot analysis.

(B) Representative images (left) and quantification (right) of the wound healing assay using HT-29 cells with SHMT2<sup>WT</sup> overexpression (n = 3). Scale bar, 200  $\mu$ m. \*  $p < 0.05$ ; Student's t-test.

(C) Representative images (left) and quantification (right) of the migration and invasion assay using HT-29 cells with SHMT2<sup>WT</sup> overexpression (n = 3). Scale bar, 200  $\mu$ m. \*\*  $p < 0.01$ ; Student's t-test.

(D) The overexpression of Flag-SHMT2<sup>K95A</sup> and Flag-SHMT2<sup>K280A</sup> in HT-29 cells were confirmed by western blot analysis.

(E) Representative images (left) and quantification (right) of the wound healing assay using HT-29 cells with Flag-SHMT2<sup>K95A</sup> and Flag-SHMT2<sup>K280A</sup> overexpression (n = 3). Scale bar, 200  $\mu$ m. \*\*\*  $p < 0.001$ ; Ordinary one-way ANOVA multiple comparisons test.

---

(F) Representative images (left) and quantification (right) of migration and invasion assay using HT-29 cells with Flag-SHMT2<sup>K95A</sup> and Flag-SHMT2<sup>K280A</sup> overexpression (n = 3). Scale bar, 100 μm. \*\*\*  $p < 0.001$ ; Ordinary one-way ANOVA multiple comparisons test.

(G) Western blot analysis (left) and quantification (right) of vimentin, E-cadherin and EMT-associated transcription factors in HT-29 cells after SHMT2<sup>WT</sup> overexpression. \*  $p < 0.05$ , \*\*  $p < 0.01$ ; Student's t-test.

(H) RT-qPCR analysis of EMT-associated transcription factors in HT-29 cells after SHMT2<sup>WT</sup> overexpression (n = 3). \*  $p < 0.05$ , \*\*  $p < 0.01$ ; Student's t-test.

Data are presented as the mean ± SD from at least three independent experiments. The error bars show the SD.

**Figure S4. SHMT2 knockdown affects the expression of multiple genes in CRC cells. Related to Figure 3.**

(A) Heatmap and sample clustering analysis of the mRNA-seq analysis of HCT116 cells after SHMT2 knockdown. Each column represents a sample, and each row represents a gene. Red represents upregulated genes, and the green represents downregulated genes (n = 3).

(B) Volcano plots of the mRNA-seq analysis of HCT116 cells after SHMT2 knockdown. Blue dots represent downregulated genes, and red dots represent upregulated genes (FDR < 0.05) (n = 3).

(C) RT-qPCR was performed to verify the representative genes obtained from mRNA-seq results in HCT116 and DLD-1 cells (n = 3). \*  $P < 0.05$ , \*\*  $P < 0.01$ , \*\*\*  $P < 0.001$ ; Student's t-test.

(D) RT-qPCR analysis of Wnt target genes with SHMT2<sup>WT</sup> overexpression (n = 3). \*  $p < 0.05$ , \*\*  $p < 0.01$ , \*\*\*  $p < 0.001$ ; Student's t-test.

(E) Western Blot analysis (top) and quantification (bottom) of Wnt target genes in HT-29 cells with SHMT2<sup>WT</sup> overexpression. \*  $p < 0.05$ , \*\*  $p < 0.01$ , \*\*\*  $p < 0.001$ ;

---

Student's t-test.

Data are presented as the mean  $\pm$  SD from at least three independent experiments. The error bars show the SD.

**Figure S5. BRCC36 knockdown inhibits the  $\beta$ -catenin expression, and SHMT2 knockdown increases K63-Ub of  $\beta$ -catenin. Related to Figure 4.**

(A) Western blot analysis (left) and quantification (right) of  $\beta$ -catenin in HT-29 cells after SHMT2<sup>WT</sup> overexpression. \*\*\*  $p < 0.001$ ; Student's t-test.

(B) Western blot analysis (left) and quantification (right) of phosphorylated  $\beta$ -catenin after SHMT2<sup>WT</sup> overexpression in HT-29 cells. \*\*\*  $p < 0.001$ ; Student's t-test.

(C) Western blot analysis (up) and quantification (bottom) of  $\beta$ -catenin after BRCC36 knockdown in CRC cells. \*  $p < 0.1$ , \*\*  $p < 0.05$ , \*\*\*  $p < 0.001$ ; Student's t-test.

(D) CRC cells stably expressing shNC or shSHMT2 were treated with MG132 for 16 h before harvesting.  $\beta$ -catenin was immunoprecipitated and immunoblotted with the indicated antibodies.

Data are presented as the mean  $\pm$  SD from at least three independent experiments. The error bars show the SD.

**Figure S6. K64 of SHMT2 is critical for CRC cell proliferation, migration, and invasion. Related to Figure 5.**

(A) The overexpression of Flag-SHMT2 $\alpha$  and Flag-SHMT2<sup>K64R</sup> in HCT116 and DLD-1 was confirmed by western blot analysis.

(B) Cell proliferation was detected by a CCK8 assay after stable SHMT2 knockdown with the re-expression of shRNA-resistant SHMT2 $\alpha$  or SHMT<sup>K64R</sup> (n = 3). \*\*\*  $p < 0.001$ ; Ordinary one-way ANOVA multiple comparisons test.

(C-D) Representative images (top) and statistically analyzed (bottom) of the transwell migration and invasion assay using CRC cells after stable SHMT2 knockdown with the

---

re-expression of shRNA-resistant SHMT2 $\alpha$  or SHMT<sup>K64R</sup> (n = 3). Scale bar, 100  $\mu$ m.  
\*\*\*  $p < 0.001$ ; Ordinary one-way ANOVA multiple comparisons test.

Data are presented as the mean  $\pm$  SD from at least three independent experiments. The error bars show the SD.

**Figure S7. SHMT2 is a target gene of the Wnt/ $\beta$ -catenin pathway**

(A) The software PROMO was used to identify a putative binding site of TCF4 (TCF4 BS) in the SHMT2 gene (top). ChIP-qPCR analysis of the enrichment of TCF-4 on the SHMT2 promoter in HCT116 and DLD-1 cells (bottom) (n = 3). \*\*  $p < 0.01$ , \*\*\*  $p < 0.001$ ; Student's t-test.

(B) RT-qPCR analysis of SHMT2 expression in HCT116 and DLD-1 cells treated with Wnt signal inhibitors iCRT14 (n = 3). \*  $p < 0.05$ , \*\*  $p < 0.01$ , \*\*\*  $p < 0.001$ ; Ordinary one-way ANOVA multiple comparisons test.

(C) Western blot analysis of SHMT2 and phosphorylated  $\beta$ -catenin expression in HCT116 and DLD-1 cells treated with the Wnt signal inhibitor XAV939.

(D) Western blot analysis of SHMT2 and Cyclin D1 expression in HCT116 and DLD-1 cell treated with the Wnt signal inhibitor iCRT14.

(E) Western blot analysis of SHMT2 and  $\beta$ -catenin in HT-29 cells with Wnt3a treatment. Data are presented as the mean  $\pm$  SD from at least three independent experiments. The error bars show the SD.

**Figure S8. SHMT2 and  $\beta$ -catenin expression in CRC patients. Related to Figure 8.**

(A) The relative mRNA expression of SHMT2 in two GEO datasets (GSE117606 and GSE20916). Data are presented as the mean  $\pm$  SD. The error bars show the SD. \*\*\* $P < 0.001$ ; Student's t-test.

(B) Quantitation of SHMT2 and  $\beta$ -catenin expression in CRC tissues and NATs in 85 human CRC specimens.

(C) The expression of nucleus  $\beta$ -catenin in CRC tissues with low or high expression of

---

SHMT2.

(D) Representative IHC staining images of SHMT2 and  $\beta$ -catenin in human CRC tissues. The arrow points to the position where  $\beta$ -catenin enters the nucleus: scale bar, 200  $\mu\text{m}$ , or 50  $\mu\text{m}$ .

(E) Survival analysis of the correction of SHMT2 expression in CRC tissues with patients' survival rate. \*\*\* $P < 0.001$ ; Log-rank test.

---

**Table S1. Go pathway analysis. Related to Figure 3.**

| <b>Style</b> | <b>Pathway Term</b>                         | <b>DifGene</b> | <b>P-Value</b> | <b>Enrichment</b> |
|--------------|---------------------------------------------|----------------|----------------|-------------------|
| down         | Wnt signaling pathway                       | 15             | 0.0233         | 1.3669            |
| down         | TGF- $\beta$ signaling pathway              | 12             | 0.0190         | 1.9454            |
| down         | Arginine and proline metabolism             | 8              | 0.0281         | 1.8905            |
| down         | Alanine, aspartate and glutamate metabolism | 6              | 0.0308         | 2.3237            |
| down         | Glycine, serine, and threonine metabolism   | 6              | 0.0272         | 2.1449            |
| down         | Notch signaling pathway                     | 6              | 0.0326         | 1.7428            |
| down         | beta-Alanine metabolism                     | 5              | 0.0298         | 2.3237            |
| down         | Histidine metabolism                        | 5              | 0.0373         | 2.2487            |

---



---

**Table S2. Clinicopathologic characters of CRC patients. Related to Figure 8.**

| Characteristic          | Cohort 1, n |
|-------------------------|-------------|
| Patients                | 85          |
| Age, yr (median, range) | 63 (33-86)  |
| Gender                  |             |
| Male                    | 49 (57%)    |
| Female                  | 36 (43%)    |
| T stages                |             |
| T1-T2                   | 3 (3%)      |
| T3-T4                   | 82 (97%)    |
| Lymph node involvement  |             |
| No                      | 51 (60%)    |
| Yes                     | 34 (40%)    |
| Distance metastasis     |             |
| No                      | 85 (100%)   |
| Yes                     | N           |
| AJCC stages             |             |
| I-II                    | 49 (57%)    |
| III-IV                  | 36 (43%)    |

---

**Table S3. Primers used in this study.**

| Primer set     | Forward                   | Reverse                    |
|----------------|---------------------------|----------------------------|
| <i>β-actin</i> | TGACGTGGACATCCGCAAAG      | CTGGAAGGTGGACAGCGAGG       |
| <i>SHMT2</i>   | CCTGCCCTGAGTTTCCATTA      | GTCTGGTGTCTGGCTCTGAT       |
| <i>TGFR2</i>   | CGGTAA TAACGACATGATAGTCAC | TCATGGCAAACGTCTCTAGTGTTA   |
| <i>p21</i>     | GGACAGCAGAGGAAGACCATGT    | TGGAGTGGTA GAAATCTGTCTATGC |
| <i>c-Myc</i>   | GCCACGTCTCCACACATCAG      | TGGTGCATTTTCGGTTGTTG       |
| <i>PTEN</i>    | CAATGTTTCACTGGCGGAA       | TCGTGTGGGTCCTGAATT         |
| <i>KRAS</i>    | ACAGAGAGTGGAGGATGCTTT     | TTTCACACAGCCAGGAGTCTT      |
| <i>BRAF</i>    | CAAACCTATAGATATTGCACA     | TCTGGTGCCATCCACAAAATG      |
| <i>CCND1</i>   | CCCTCGGTGTCCTACTTCA       | CTCCTCGCACTTCTGTTTCT       |
| <i>TCF</i>     | CTCCGATGTCCACTTTCCAT      | CGCTTCCTCTATTTGCCATT       |
| <i>CTNFB1</i>  | TGGTGACAGGGAAGACATCA      | CCATAGTGAAGGCGAAGTGC       |
| <i>CD44</i>    | TCAGAGGAGTCGGAGAGAGGAAAC  | GAAAAGTCAAAGTAACAATAACGTGG |
| <i>COX2</i>    | CGGCGGACTAATCTTCAACT      | CGGTGAAAGTGGTTTGGTTT       |
| <i>FGF18</i>   | AGTGGGAAACACATCCAGGT      | CGGACTTGACTACCGAAGG        |
| <i>FRA-1</i>   | TGACCACACCCTCCCTAACT      | CTGCTGCTACTCTTGCGATG       |
| <i>c-JUN</i>   | AAAGGAAGCTGGAGAGAATCG     | TGTTCCCTGAGCATGTTGG        |
| <i>MET</i>     | TGCACAGTTGGTCTGCCATGA     | CAGCCATAGGACCGTATTTTCGG    |
| <i>LEF</i>     | ACCTCTTGGCTGGTTTTCCGTCA   | GTCAGTGTGGGGATGTTTCT       |
| <i>MMP2</i>    | CCATCGAGACCATGCGGAAGC     | CATCGCTCCAGACTTGGAAGGC     |
| <i>MMP7</i>    | ACCGTGCTGTGTGCTGTGT       | GTCCTGAGCCTGTTCCCACT       |
| <i>MMP9</i>    | TTCTGCCAGGACCGCTTCTAC     | AGGATGTCATAGGTCACGTAGCC    |
| <i>Twist</i>   | CGGACAAGCTGAGCAAGATT      | ACGGAAGGCGTAGCTGA          |
| <i>Slug</i>    | CAGCTCCACTCCACTCTCCT      | TGAACCACTGTGATCCTTGG       |
| <i>Snail</i>   | CACACTGGTGAGAAGCCATT      | GCCTGGCACTGGTATCTCTT       |
